# Supplementary material for: Intraperitoneal versus intravenous administration of Flamma®-conjugated PEG-alendronate-coated upconversion nanoparticles in a mouse pancreatic cancer model
Source: Royal Society of Chemistry journal article supplement (doi:10.1039/d4na00764f), 2024-10-25
Supplement: d4na00764f1.pdf [file d4na00764f1.pdf]

## Supporting Information

### Intraperitoneal *versus* intravenous administration of Flamma<sup>®</sup>-conjugated PEG-alendronate-coated upconversion nanoparticles in mice pancreatic cancer model

Taras Vasylyshyn<sup>a</sup>, Vitalii Patsula<sup>a</sup>, David Větvička<sup>b</sup>, Oleksandr Shapoval<sup>a</sup>, Jan Pankrác<sup>c</sup>, Martina Kabešová<sup>b</sup>, Jiří Beneš<sup>b</sup>, Daniel Horák<sup>a</sup>

<sup>a</sup> Institute of Macromolecular Chemistry, Czech Academy of Sciences, Heyrovského nám. 2, 162 06 Prague 6, Czech Republic

<sup>b</sup> Institute of Biophysics and Informatics, First Faculty of Medicine, Charles University, Salmovská 1, 120 00 Prague 2, Czech Republic

<sup>c</sup> Center for Advanced Preclinical Imaging, First Faculty of Medicine, Charles University, Salmovská 3, 120 00 Prague 2, Czech Republic

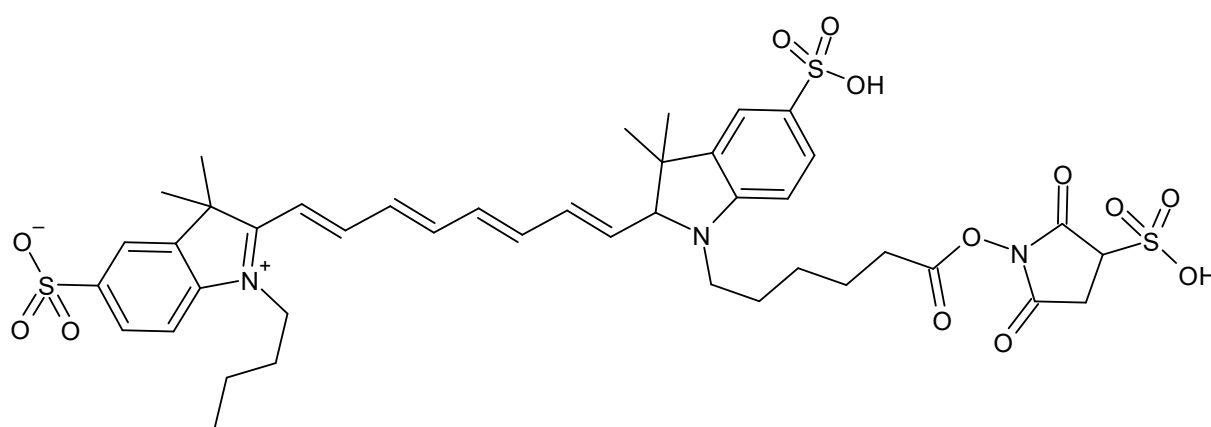

**Figure S1.** Formula of Flamma<sup>®</sup> 749 sulfo-NHS ester.

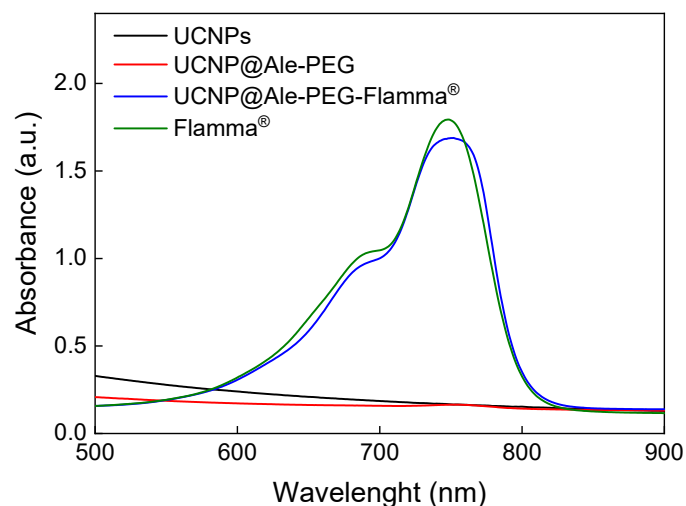

**Figure S2.** UV-Vis spectra of UCNPs, UCNP@Ale-PEG, UCNP@Ale-PEG-Flamma<sup>®</sup> and Flamma<sup>®</sup>.

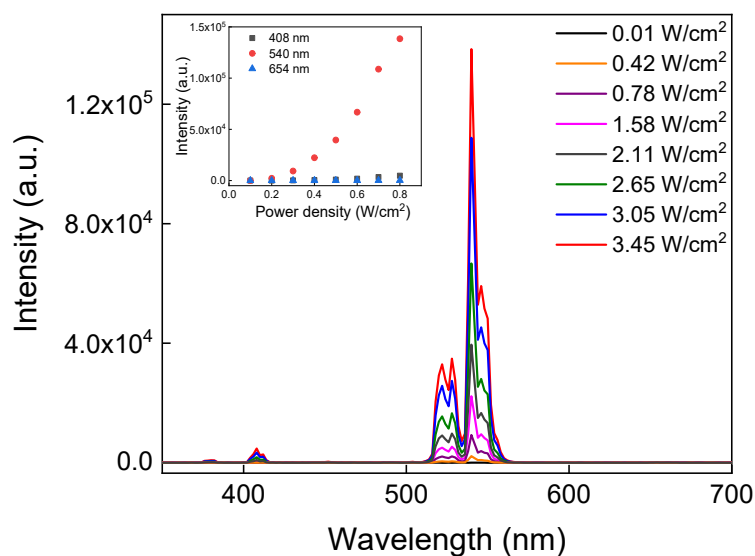

**Figure S3.** Upconversion photoluminescence emission spectra of aqueous UCNP@Ale-PEG-Flamma<sup>®</sup> dispersions (2 mg/ml) excited at 980 nm with different power densities. The inset shows the dependence of peak intensity on particle concentrations.

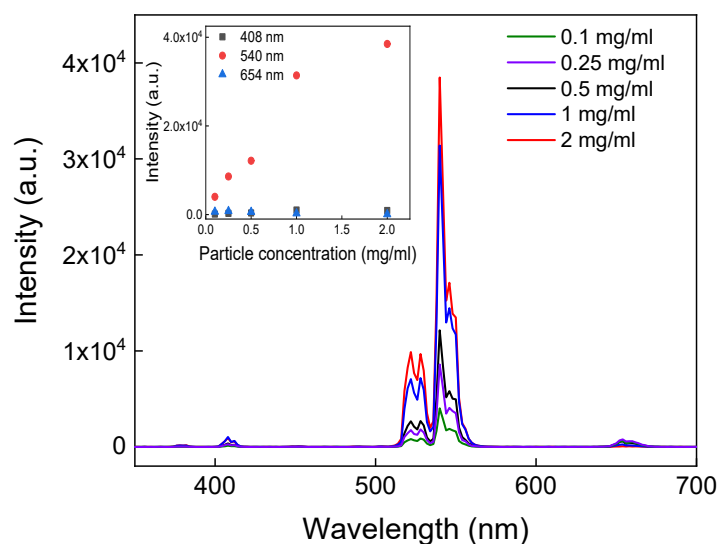

**Figure S4.** Upconversion photoluminescence emission spectra of aqueous UCNP@Ale-PEG-Flamma<sup>®</sup> dispersions at different concentrations; excitation at 980 nm, power density 2.11 W/cm<sup>2</sup>. The inset shows the dependence of peak intensity on laser power density.
